# Supplementary material for: Autism-like behaviours and enhanced memory formation and synaptic plasticity in Lrfn2/SALM1-deficient mice
Source: PubMed Central journal article supplement (PMC5472790; doi:10.1038/ncomms15800), 2017-06-12
Supplement: ncomms15800-s1.pdf [file ncomms15800-s1.pdf]

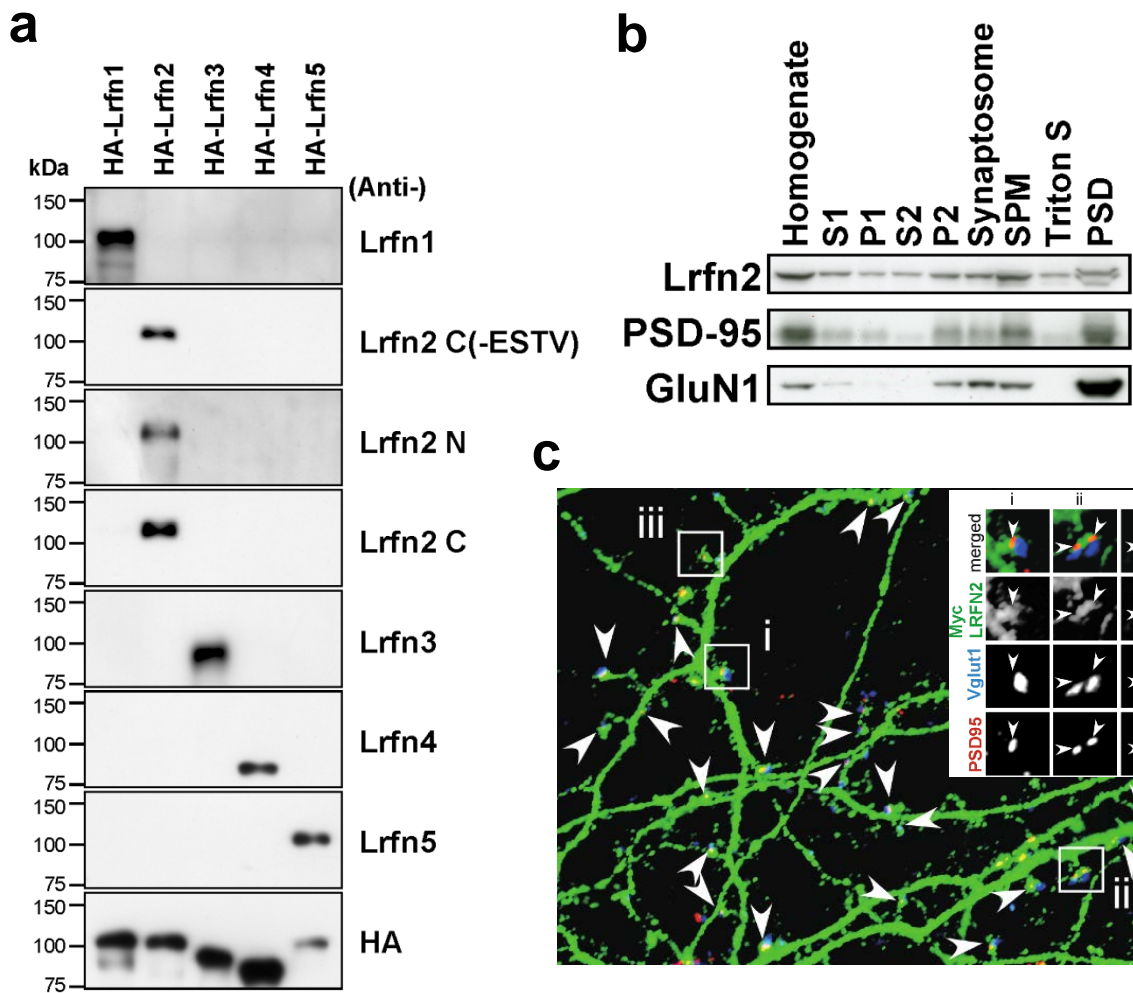

**Supplementary Figure 1 related to Figure 1.**  
**Specificity of antibodies and characterization of Lrfn2 in cultured hippocampal neurons.**

(a) Full-length HA-tagged Lrfn1-5 were expressed into COS7 cells, and the cell lysates were probed with rabbit anti-Lrfn specific antibodies. The same lysates were also probed with an antibody of HA epitope tag that recognizes all HA-Lrfn proteins. Lrfn2N antibody reacts to the extracellular region, the others are against the intracellular regions. (b) Subcellular distribution of Lrfn2 protein. 4-week old mouse brains mainly containing hippocampus and cortex were homogenized and were detected by immunoblot analysis using antibodies of Lrfn2-N, PSD-95 and GluN1. S, supernatant; P, pellet; SPM, synaptosomal plasma membrane fraction; Triton S, supernatant after extraction of SPM with Triton X-100; PSD, postsynaptic density fraction. Homogenate sample was loaded with 25  $\mu$ g protein per lane, and other fractions were loaded with 10  $\mu$ g protein per lane. (c) Immunostaining of Myc-tagged human LRFN2 protein expressed in Lrfn2 KO hippocampal neurons. Antibodies against Myc (*MycLRFN2*, green), Vglut1 (blue), and PSD-95 (red) were used for the triple staining. Arrowheads indicate the Myc<sup>+</sup>PSD-95<sup>+</sup>Vglut1<sup>+</sup> synapses. Inset indicates each protein distribution in the three boxed regions (i – iii).

(d) Immunoprecipitation analysis of Lrfn2 protein. Mouse Lrfn2 proteins in synaptosomal fraction were precipitated with anti-Lrfn2C antibody or normal rabbit IgG as negative control. The synaptosomal fraction was prepared from adult mouse cerebral cortex and hippocampus. Immunoblotting revealed the immunocomplex of Lrfn2 contains PSD-95, GluA1, GluA2, GluN2A and GluN2B, but not synaptophysin. Input, 5%.

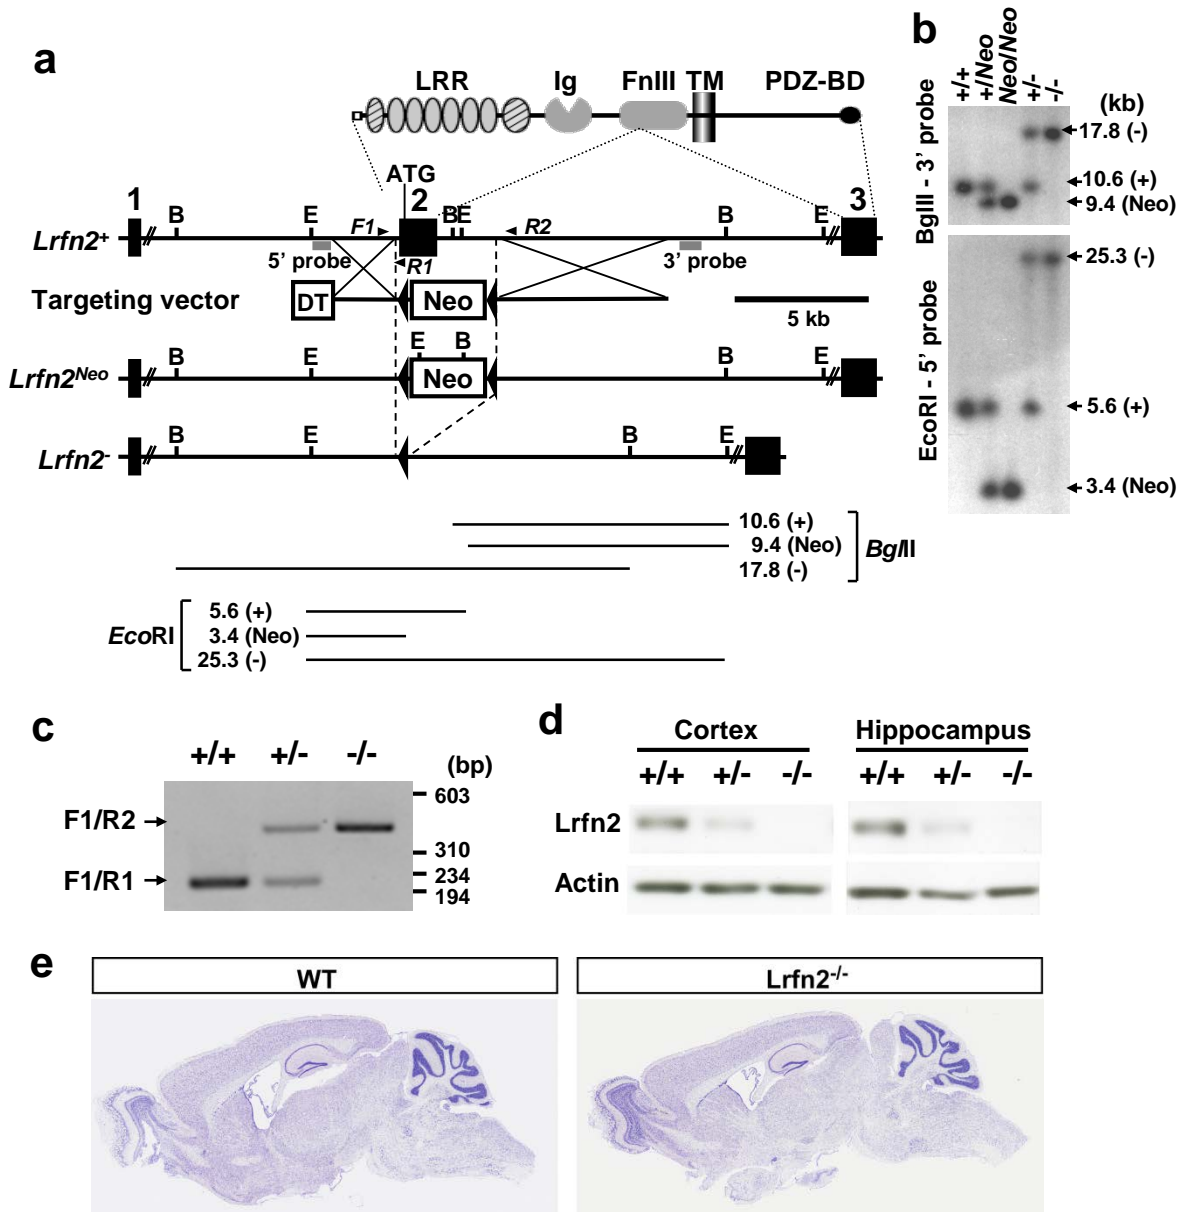

**Supplementary Figure 2 related to Figure 2.**  
**Generation and characterization of *Lrfn2* KO mice.**

(a) Targeting strategy for the disruption of the *Lrfn2* gene. Schematic diagram of domain structure of *Lrfn2* protein, the mouse *Lrfn2* genomic structure with 3 exons are indicated by black boxes. The exon 2 including the translation initiation codon (ATG) was replaced by a floxed-neomycin resistance cassette. Homologous recombination results in an out-of-frame mutation in the *Lrfn2* gene. 5'- or 3'-probes are indicated by gray bar. Locations of PCR primers for genotyping are indicated by arrowheads (*F1*, *R1* and *R2*). Restriction enzyme site: *B*, *Bgl*II; *E*, *Eco*RI. *Black triangle*, loxP sequence; *Neo*, floxed-neomycin-resistant gene; *DT*, diphtheria toxin. (b) Southern blot analysis of *Bgl*II-digested genomic DNA using 3' probe (*upper panel*) or *Eco*RI-digested genomic DNA using 5' probe (*lower panel*). (c) PCR genotype analysis of representative litter from heterozygote intercross. (d) Immunoblot analysis of *Lrfn2* protein in the cortex and hippocampus from adult littermates. Anti-*Lrfn2*C antibody was used for the detection. (e) Normal histology in cresyl violet staining of adult *Lrfn2* KO brain.

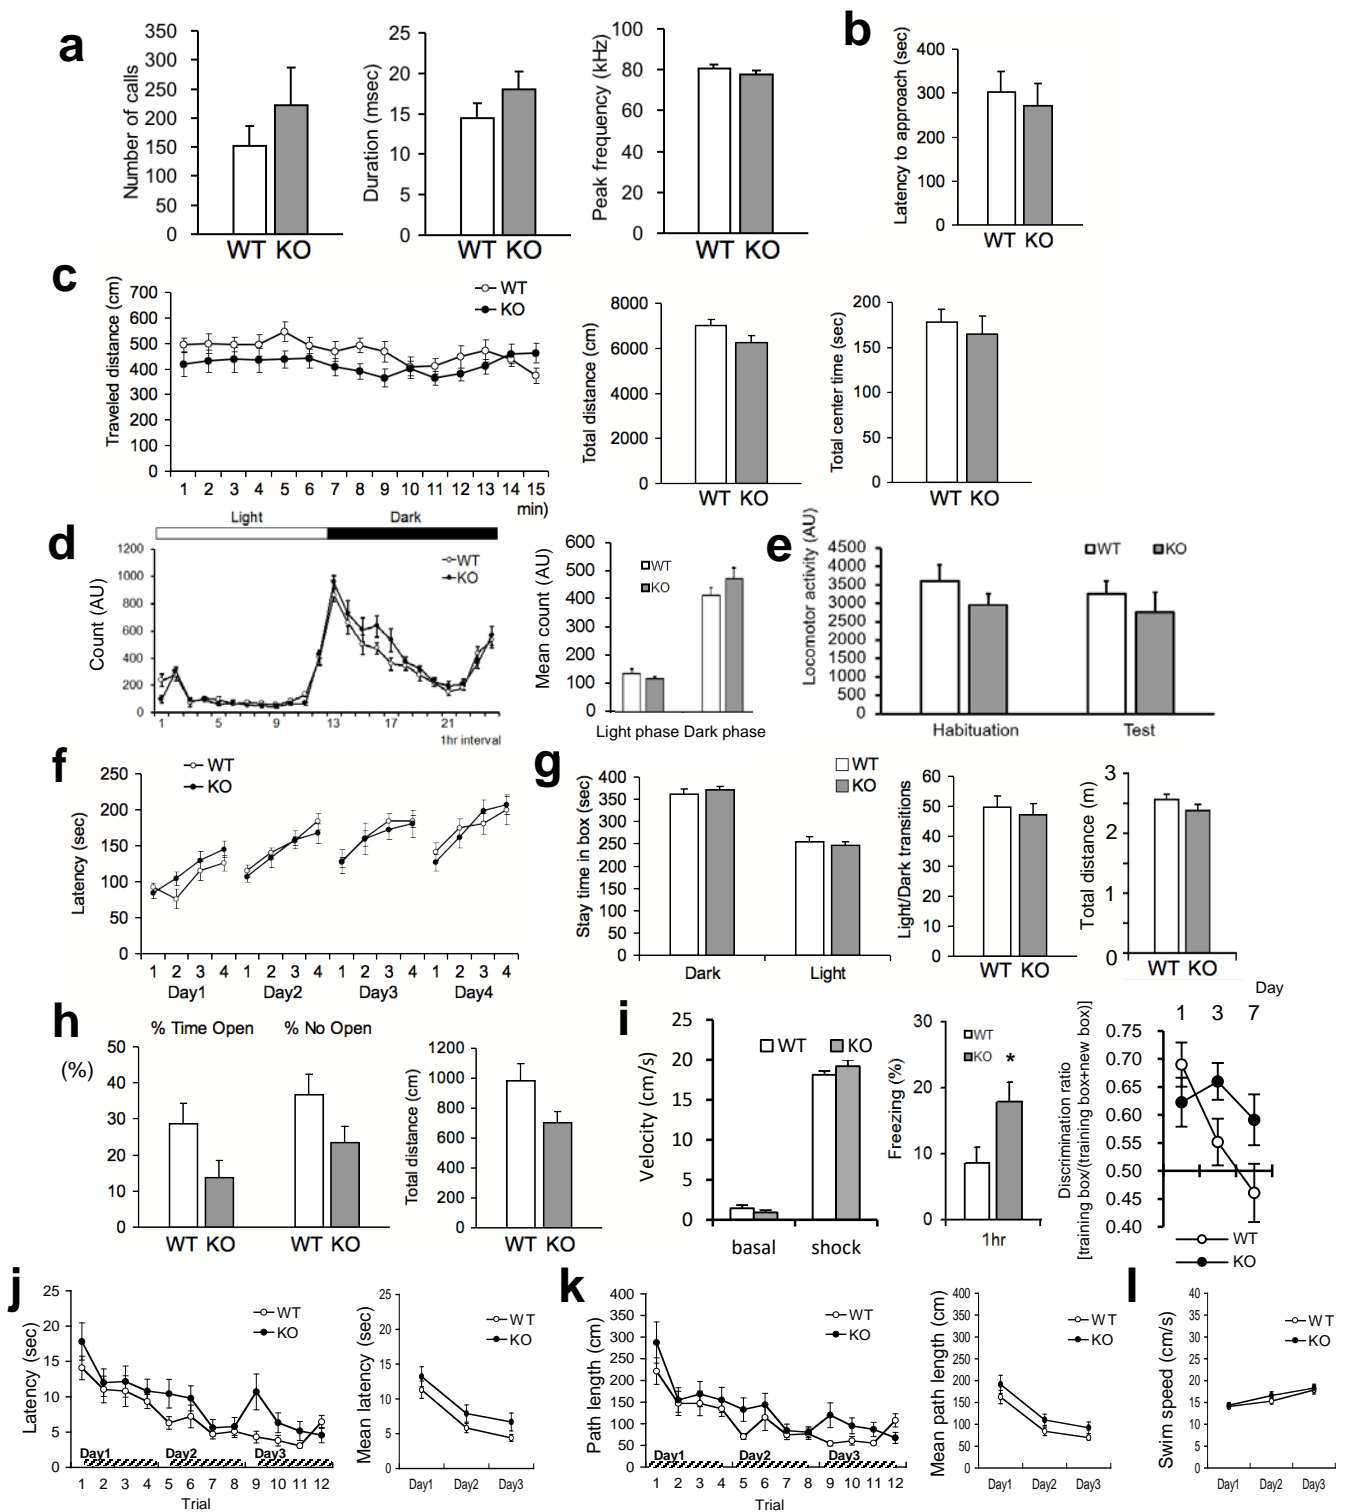

**Supplementary Figure 3 related to Figure 2 and Figure 3**  
**Supplemental results for *Lrfr2* KO behavioral tests.**

(a) Isolation induced USV emission. USV emissions were recorded from the maternally isolated mice at 7 days after birth. WT,  $n = 11$  mice; KO,  $n = 10$  mice. Number, duration, and peak pitch of the USV elements were not significantly different between the two genotypes. (b) Hidden-cookie finding test of olfaction. (c) Open field test. (left) Time course of locomotor activity indicated by traveled distance in the open arena. (middle) Total distance traveled during the 15 min test period. (right) Total center time during the test period. (d) Spontaneous motor activity in homecages (mean of 7 days recording). (e) Locomotor activity during marble burying test. (f) Accelerating rotarod test. Latency times to fall from the rotating rod are indicated. (g) Light/dark transition test. (left) Time stayed in dark or light box. (middle) Number of light-dark boxes transition. (right) Total distance traveled. (h) Elevated plus maze test. For all tests in (b-h), WT,  $n = 10$  mice; KO,  $n = 10$  mice. (i) Fear conditioning. (left) Movement velocity before (basal) and after footshock. (middle) Freezing 1 h after conditioning.  $*P < 0.05$  (right) Discrimination ratio.  $P = 0.051$  (Day 3),  $P = 0.068$  (Day 7) in  $t$ -test.  $P = 0.050$  in two-way repeated measures ANOVA (genotype  $\times$  day). (j-l) Morris water maze test using a visible platform. The latency to reach the platform (j), path length (k), and swim speed (l) in *Lrfr2* KO mice were comparable to those in WT littermates, indicating that visual recognition, motor skills, and motivation are not impaired in *Lrfr2* KO mice.

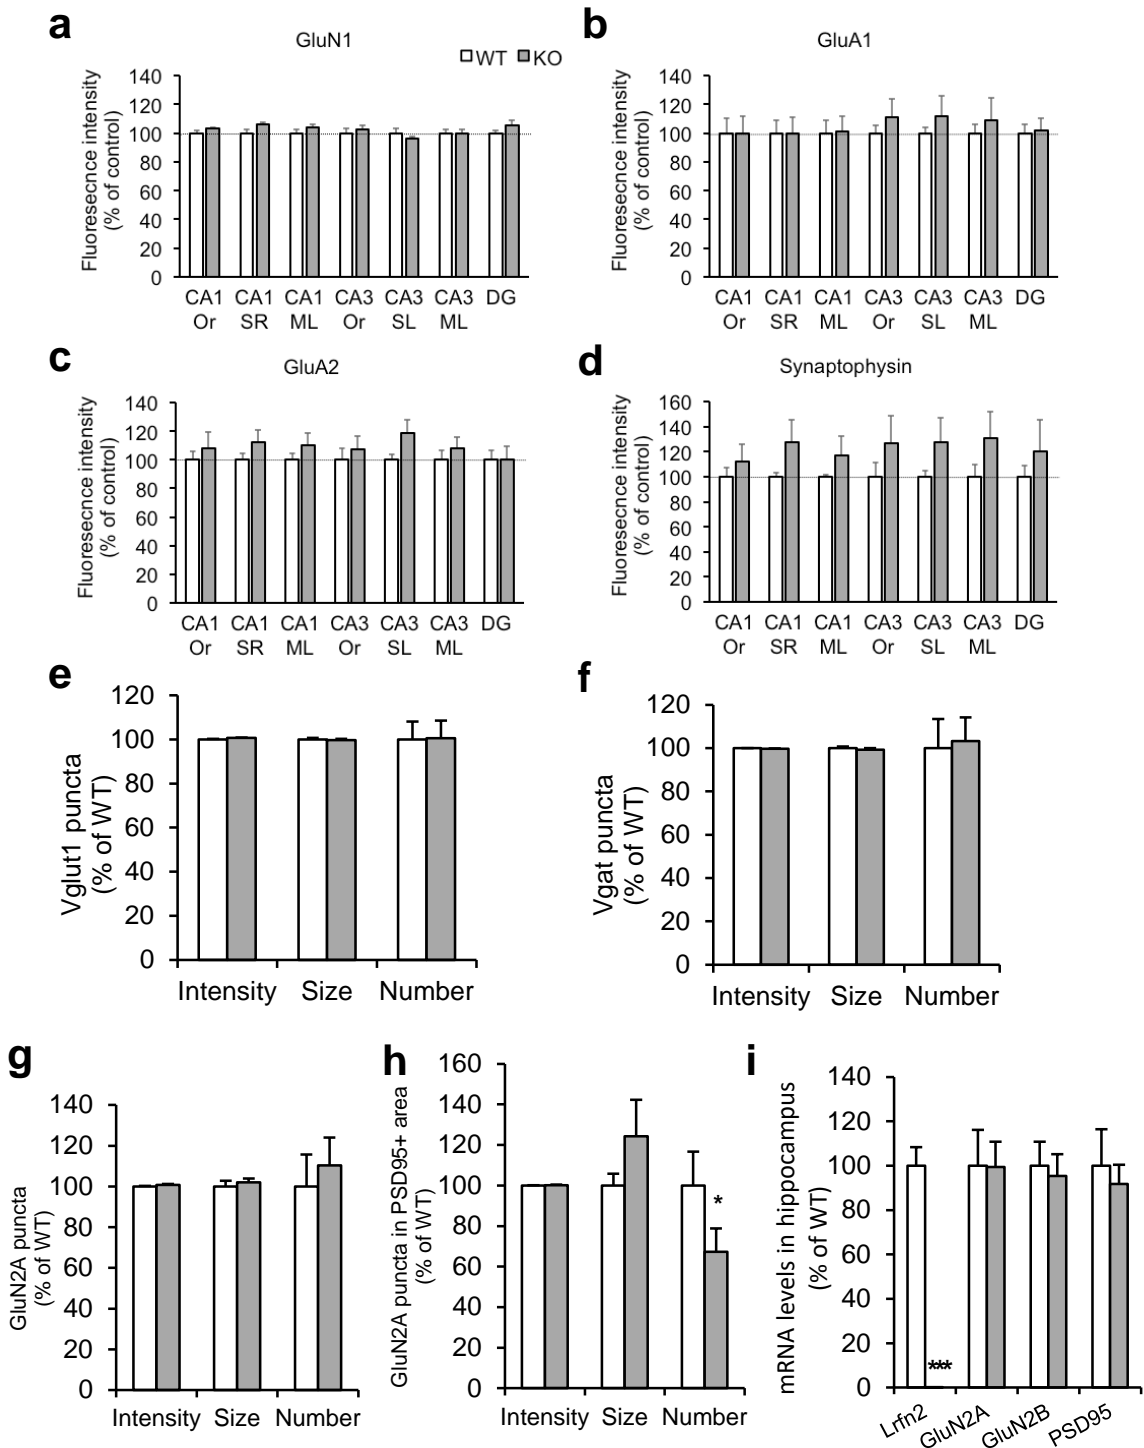

**Supplementary Figure 4 related to Figure 4.**

**Quantification of additional synaptic proteins in *Lrfn2* KO hippocampus by immunostaining.**

(a-d) Immunofluorescence staining was carried out in 8-week-old WT and KO hippocampus, and fluorescent intensities of CA1, CA3 and DG were quantified for Synaptophysin, GluA1, GluA2 and GluN1. Or, oriens layer; Rad, radial layer; Lmol, lacunosum molecular layer; Slu, stratum lucidum layer; Mol, molecular layer. n = 6–8 sections from 3–4 mice per genotype. (e-h) Immunostaining was carried out in 5-8 months-old male WT and KO hippocampus. Intensity, size, and number of Vglut1 puncta (e), Vgat puncta (f), GluN2A puncta (g), and GluN2A puncta in PSD95-positive area (h) were quantified in CA1 radial layer. n = 24-46 images from 5-6 WT mice; n = 28-47 images from 6-7 KO mice. (i) Quantitative PCR analysis of mRNA levels. Values were normalized by those of GAPDH mRNA. WT, n = 6 hippocampi from 3 mice; KO, n = 10 hippocampi from 5 mice. (a-i) open bar, WT; gray bar, KO. \* $P < 0.05$ , \*\*\*  $P < 0.001$ , *t*-test.

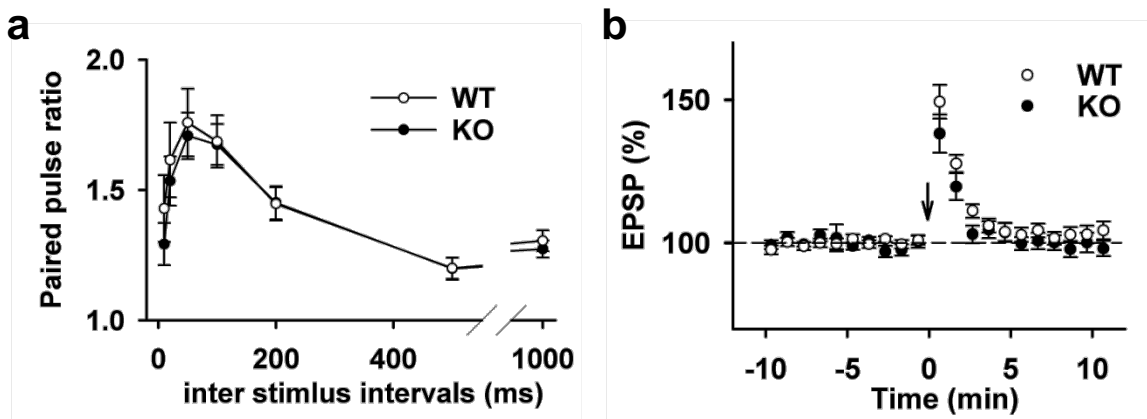

**Supplementary Figure 5 related to Figure 6. Paired-pulse ratio and posttetanic potentiation in *Lrfn2* KO hippocampus CA1 region.**

(a) Summary of paired-pulse ratio (n = 8 slices from 4 WT, n = 10 slices from 5 KO mice). The loss of *Lrfn2* function had no effect on the release probabilities. (b) Summary of posttetanic potentiation (WT, n = 13 slices from 3 mice; KO, n = 11 slices from 3 mice).

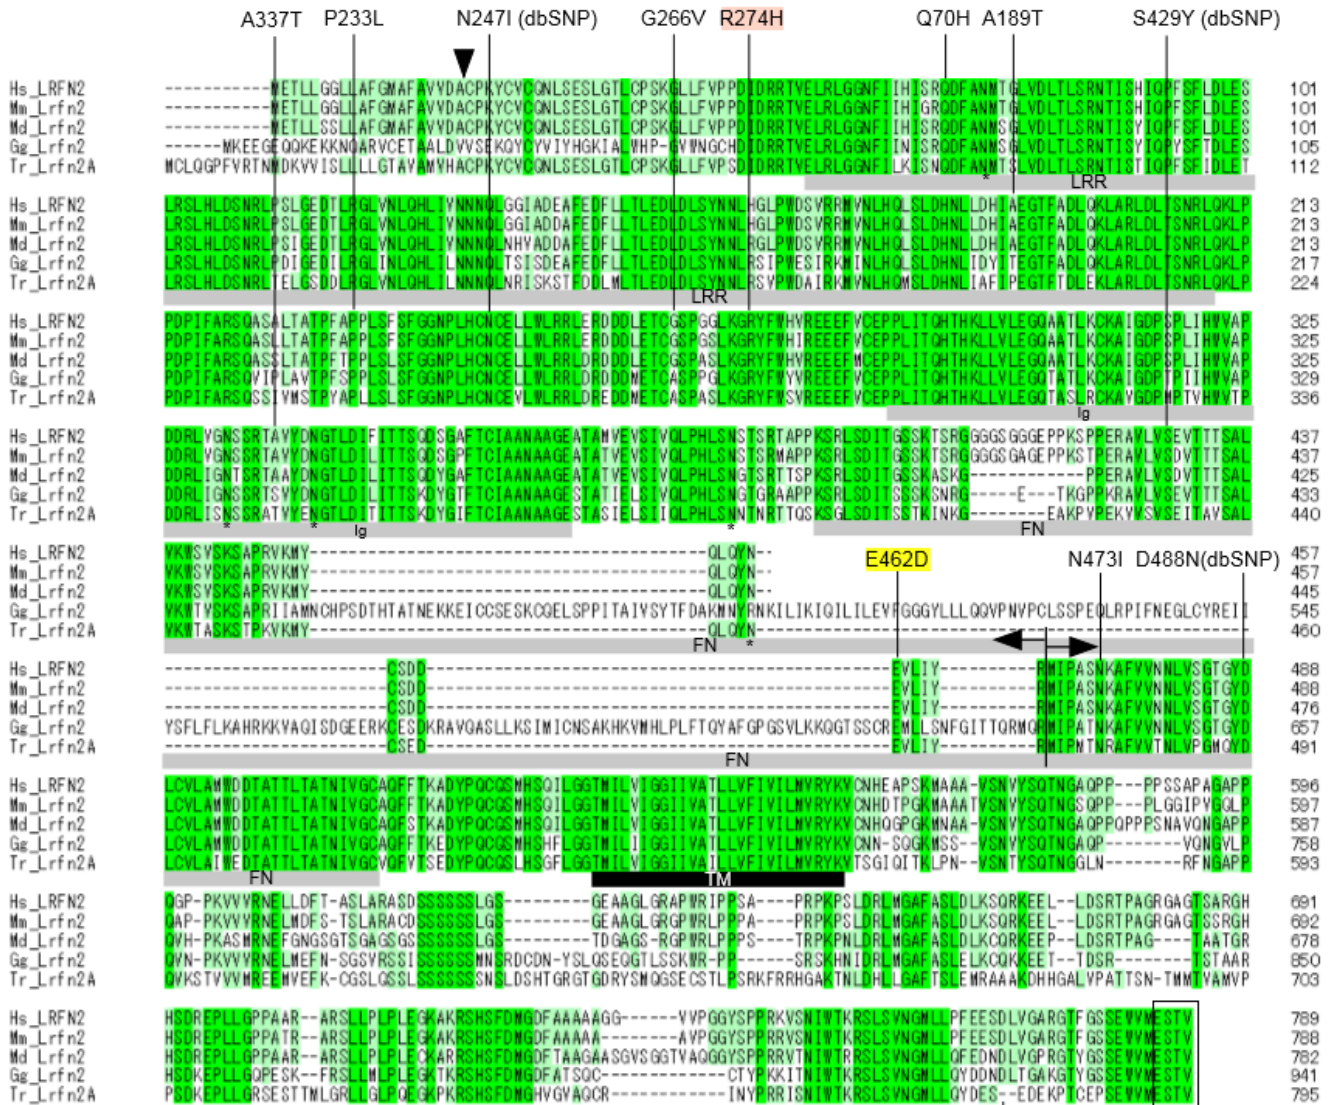

Hs, Homo sapiens (human)  
 Mm, Mus musculus (mouse)  
 Md, Monodelphis domestica (opossum)  
 Gg, Gallus gallus (chicken)  
 Tr, Tetraodon nigroviridis (fugu fish)

**LRR** Leucine-rich repeat domain  
**FN** Fibronectin type3 domain  
**Ig** Immunoglobulin like domain  
**TM** Transmembrane domain

dbSNP, collected from NCBI dbSNP

\* predicted I N-glycosylation site  
 SNPs only in schizophrenia patients  
 SNPs only in autism patients  
 conserved exon-intron boundary  
 PDZ binding domain  
 predicted signal peptide cleavage sites

**Supplementary Figure 6 related to Figure 9.**

**Location of the nonsynonymous SNPs of LRFN2 shown with multiple alignments of five vertebrate species.**

Hs, *Homo sapiens* (human); Mm, *Mus musculus* (mouse); Md, *Monodelphis domestica* (opossum); Gg, *Gallus gallus* (chicken); Tr, *Tetraodon nigroviridis* (fugu fish). Dark green, absolutely conserved residues among the five orthologs; light green conserved in more than half orthologs.

**a**

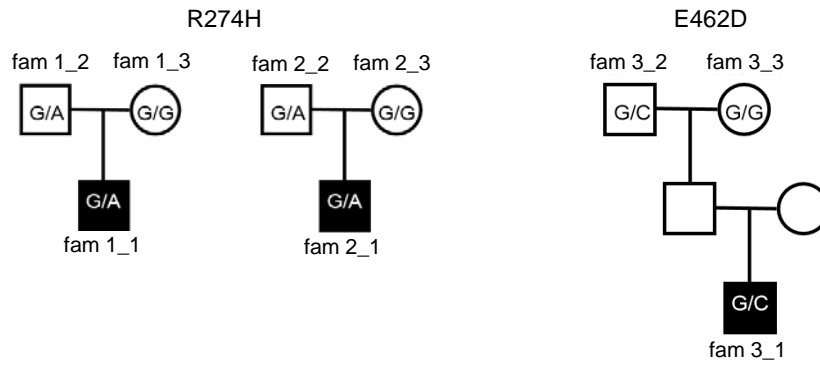

**b**

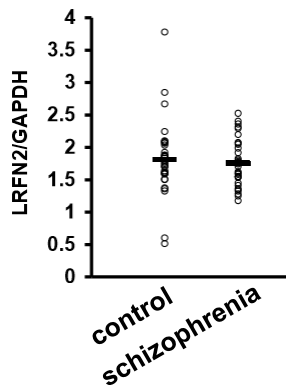

**Supplementary Figure 7 related to Figure 9.**

**Supplemental results for resequencing analysis of human LRFN2 in neuropsychiatric disorder patients.**

(a) Family-based association analysis of R274H and E462D. (b) Quantitative RT-PCR in postmortem brains. *LRFN2* mRNA amounts in postmortem brains from schizophrenia and control subjects. RNA from the dorsolateral prefrontal cortex (Brodmann's area 46) from 35 schizophrenia patients and 35 controls were subjected for quantitative RT-PCR analysis. There was no significant difference between the two groups by *U*-test.

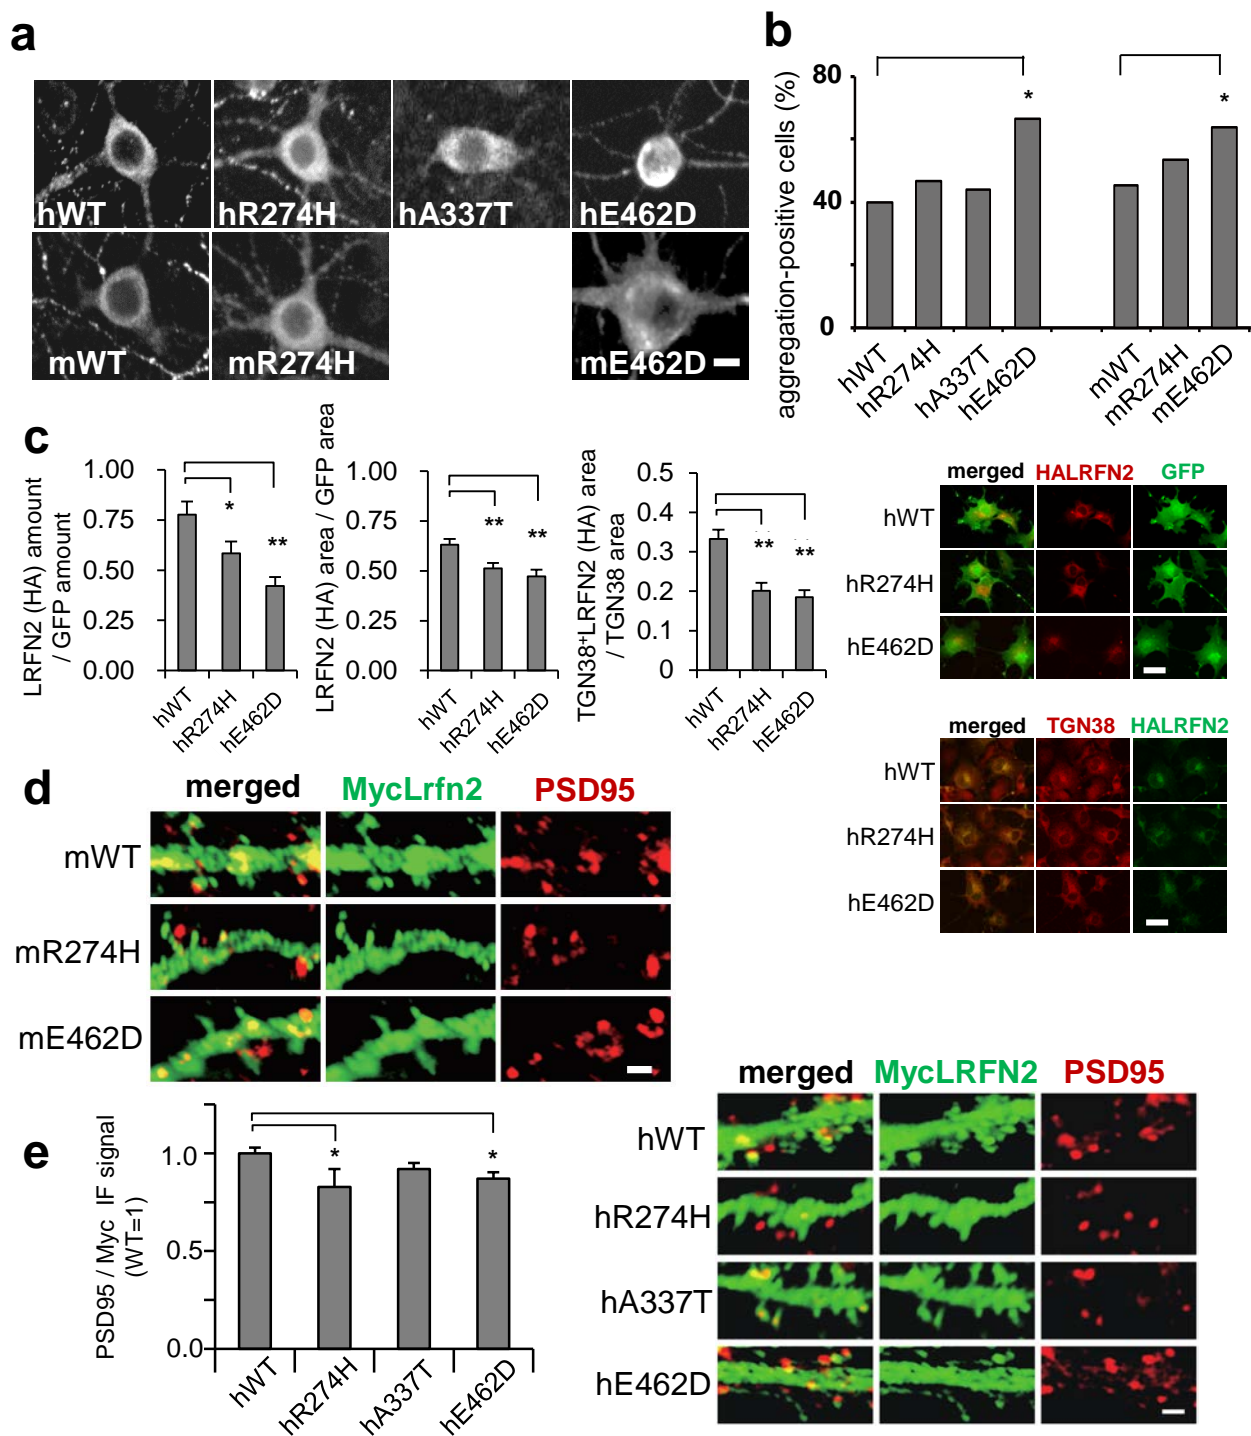

**Supplementary Figure 8 related to Figure 9.**

**Supplemental results for resequencing analysis of human LRFN2 in neuropsychiatric disorder patients.**

(a) Representative images for the localization of WT or mutant Lrfn2/LRFN2 proteins in the cell bodies of transfected hippocampal neurons (*scale bar*, 10  $\mu$ m). (b) Percentages of the aggregate-containing cell bodies among the transfectants. (n = 75-88 cells from 15 images for each group; \**P* < 0.05, compared to WT chi square-test). (c) R274H and E462D cause protein amount and trafficking abnormalities. COS7 cells were transfected with HA-LRFN2 WT, R274H, or E462D in pCAG-ires-GFP vector. Protein localization was examined by immunostaining using antibodies against HA epitope, TGN38 (trans golgi network marker), or GFP. (*left*) For each experimental group, n = 55-59 (GFP), n = 27-29 (TGN38) images each containing at least 3 cells; \**P* < 0.05, \*\**P* < 0.01, compared to WT, *t*-test; (*right*) Representative images. *Scale bars*, 50  $\mu$ m. (d) Representative images showing PSD-95 signals overlapping with transfected mouse Lrfn2 (m) proteins (*scale bar*, 5  $\mu$ m). Similar results were obtained in 3-6 independent experiments (b, c). (e) Effects of the identified mutations on PSD-95 signals overlapping with transfected human LRFN2 proteins in Lrfn2 KO hippocampal neurons (*left*). Values for WT were adjusted to 1. n = 5-15 images for each group; \**P* < 0.05, compared to WT, *t*-test. Representative images (*right*; *scale bar*, 5  $\mu$ m).



# Supplementary Figure 9-1 Full blot

Full blots for Figure 1a

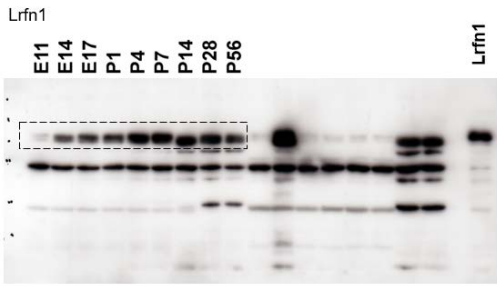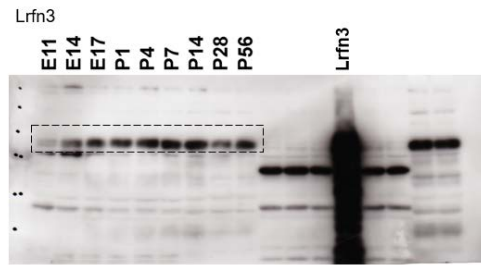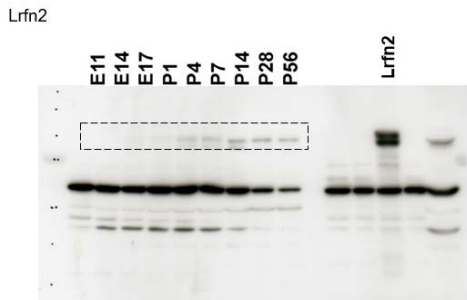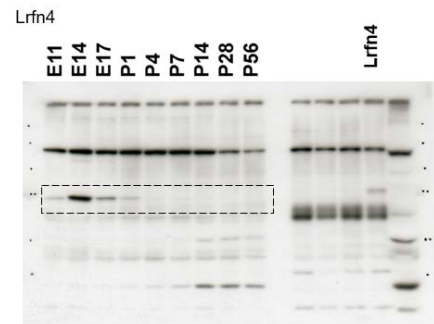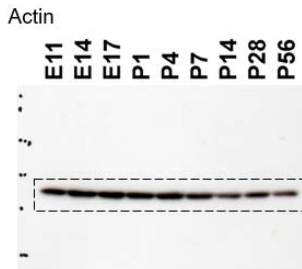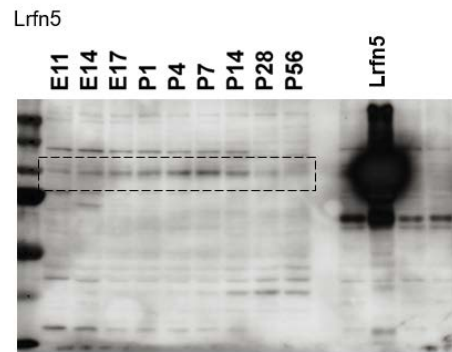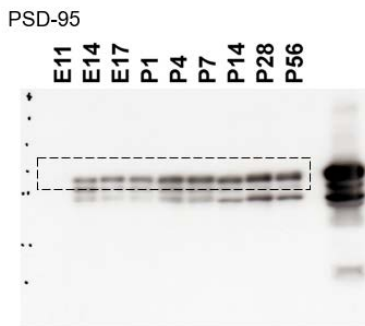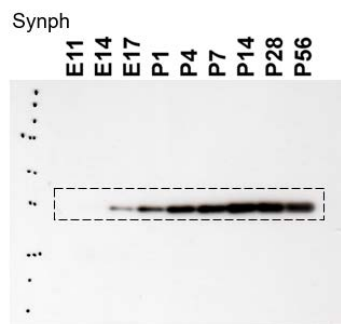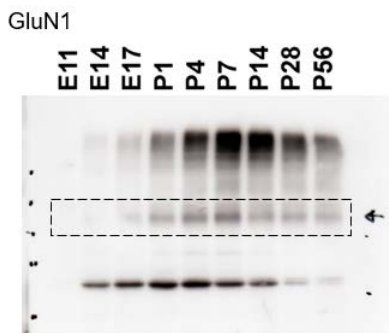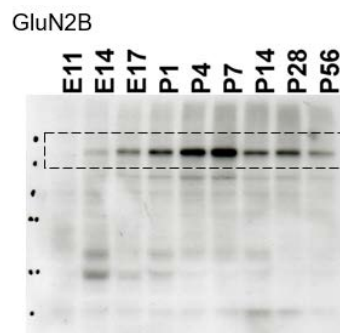

## Supplementary Figure 9-2 Full blot

Full blots for Figure 1b

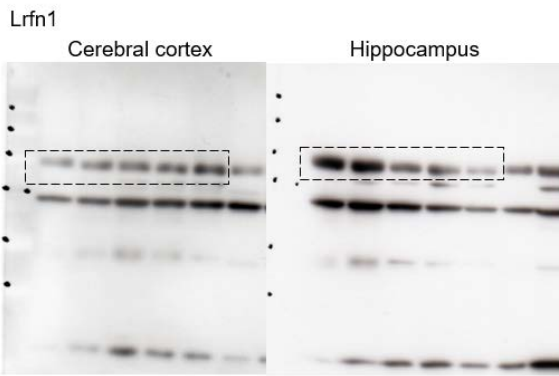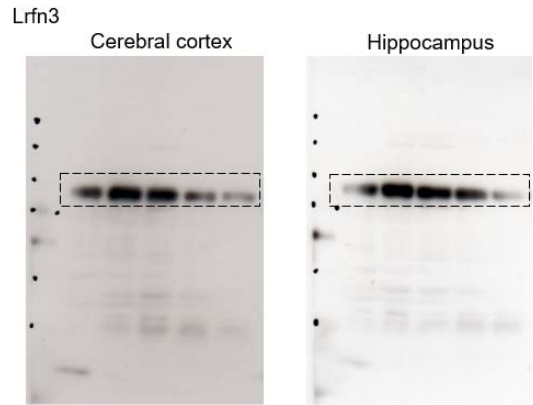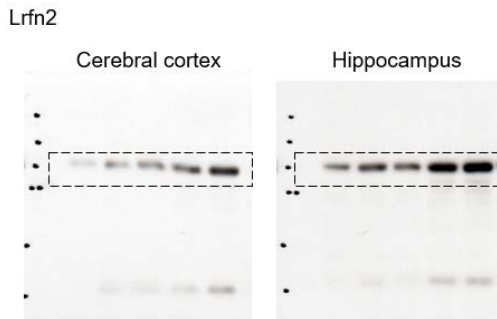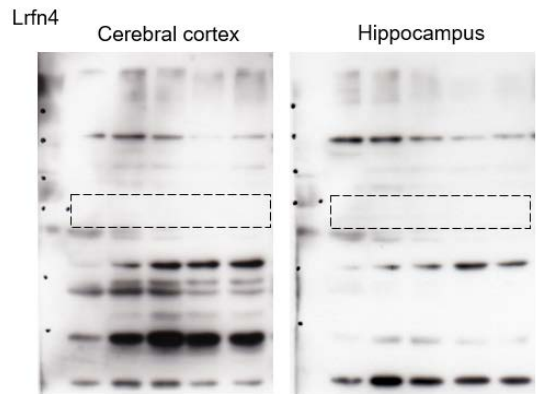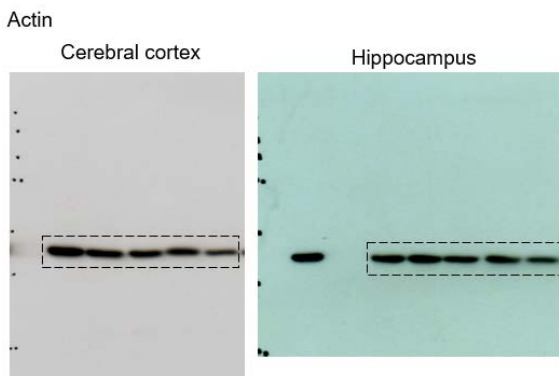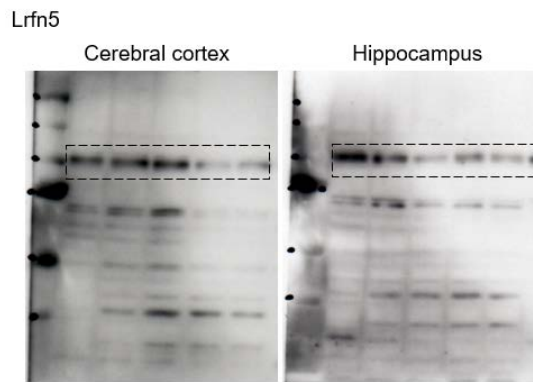

Full blots for Figure 1c

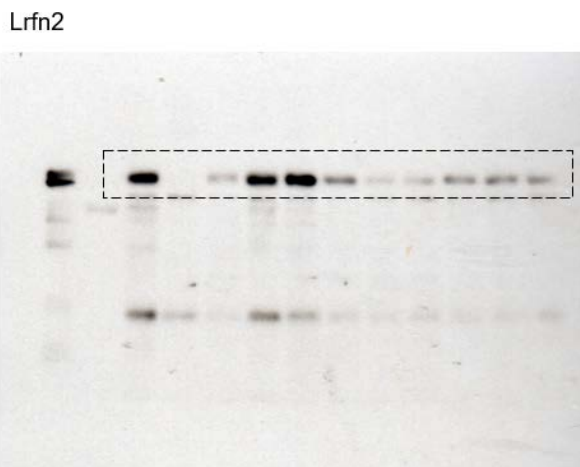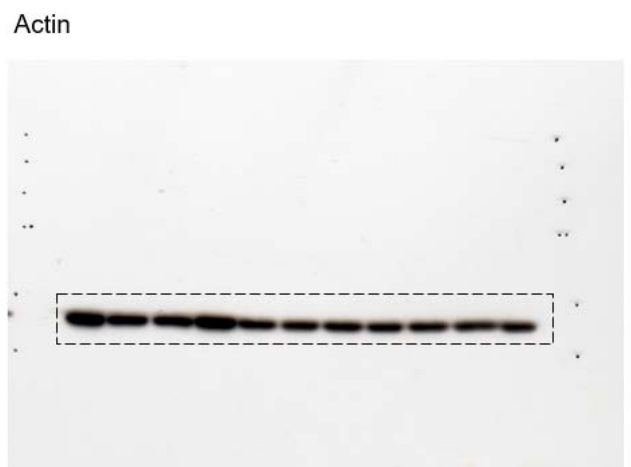

Supplementary Figure 9-3 Full blot

Full blots for Figure 7

GluN1

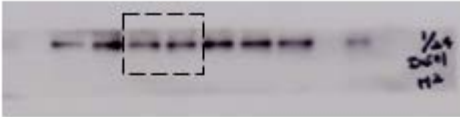

GluA1

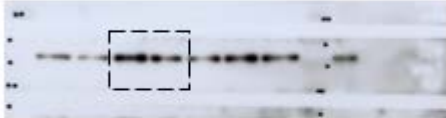

GluA2

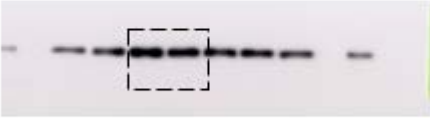

Actin

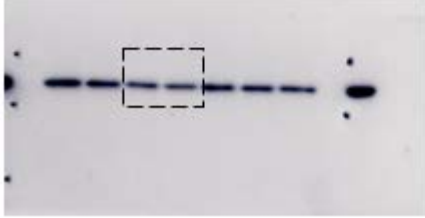

Full blots for Figure 8a

Myc

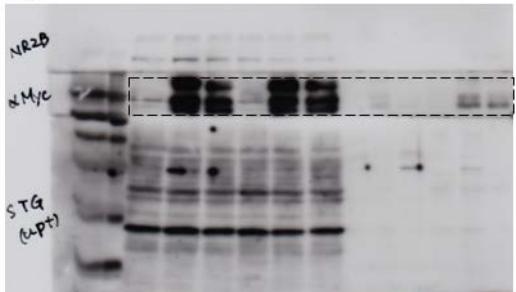

Flag

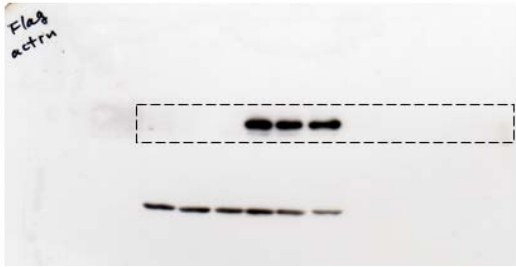

GluA1

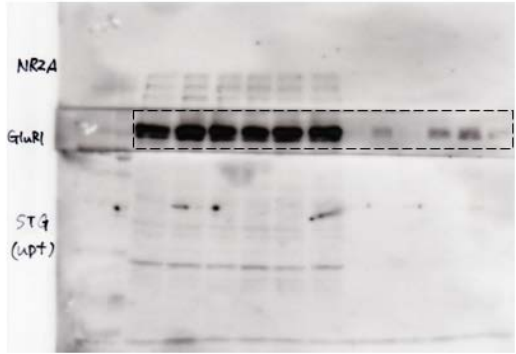

GluA2

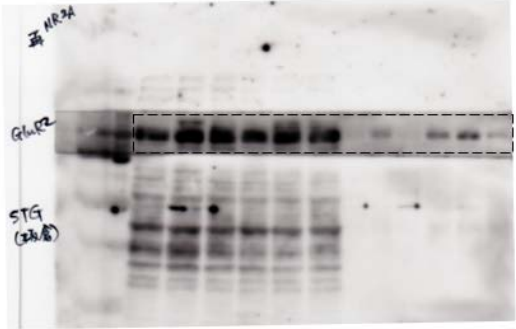

GluN1

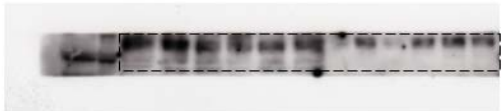

Tubulin

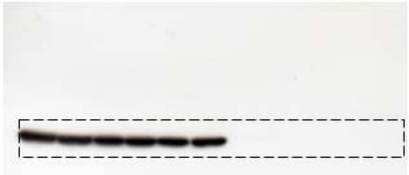

Supplementary Figure 9-4 Full blot

Full blots for Figure 9d

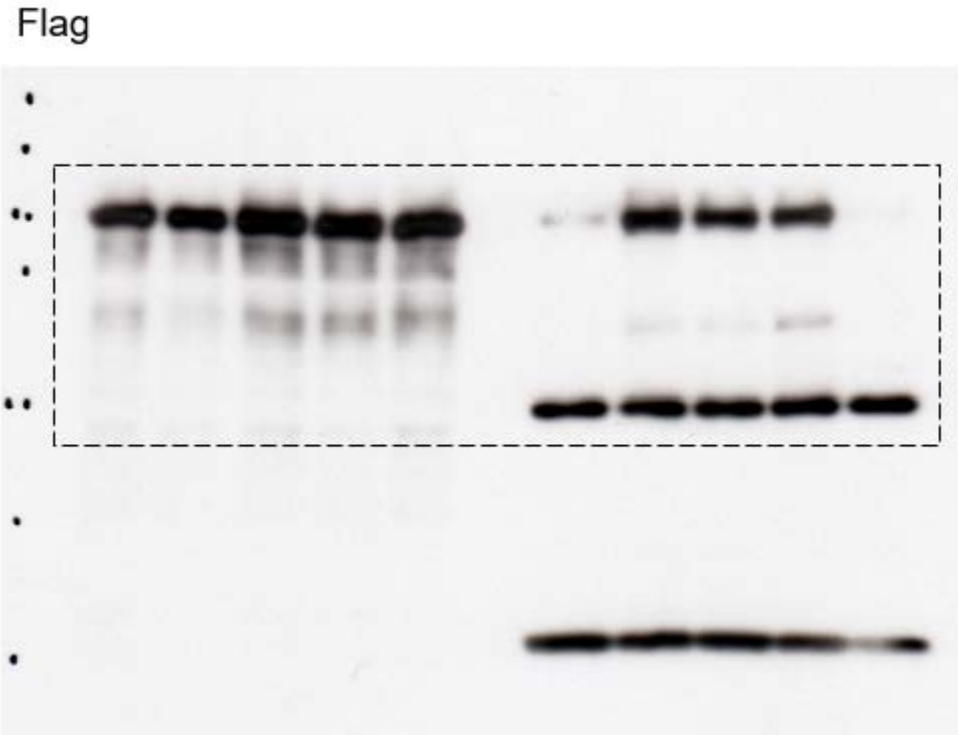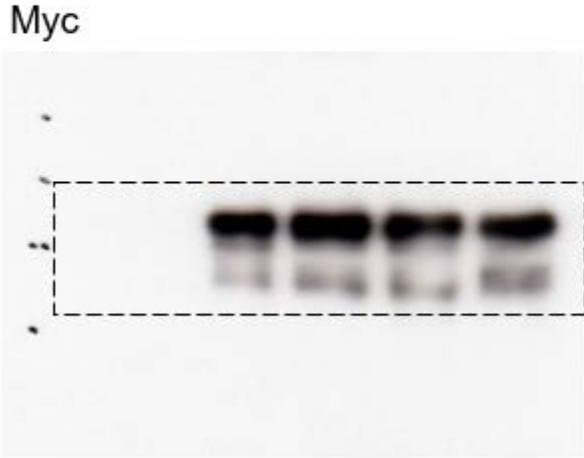

**Supplementary Figure 9-5 Full blot**

Full blots for  
Supplementary Figure 1a

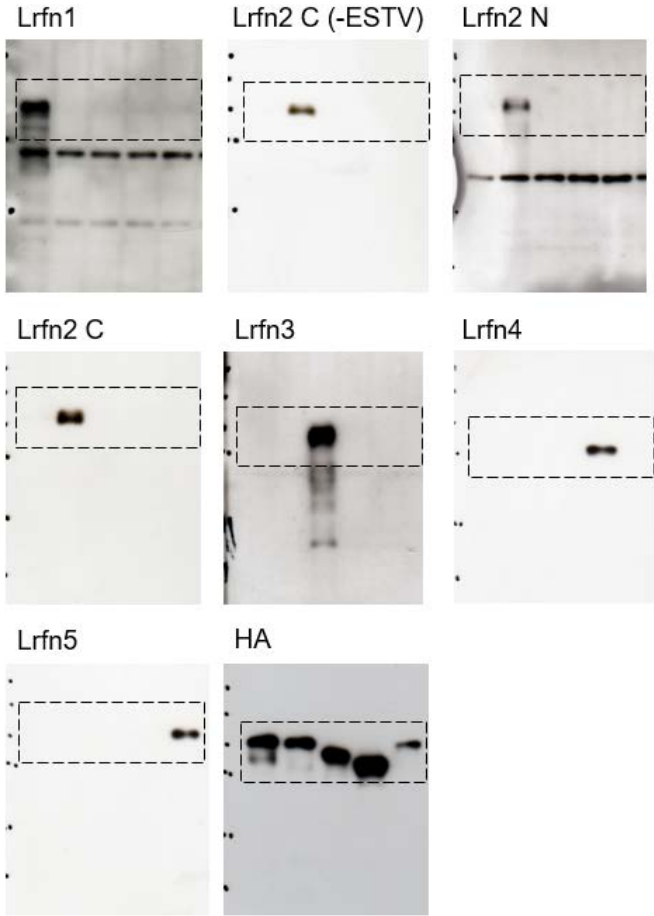

Full blots for  
Supplementary Figure 1b

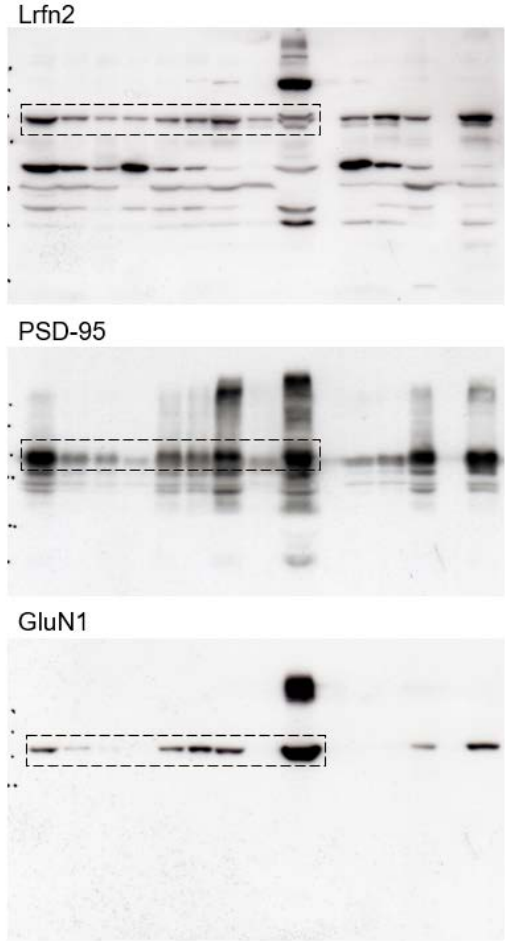

## Supplementary Figure 9-6 Full blot

Full blots for Supplementary Figure 1d

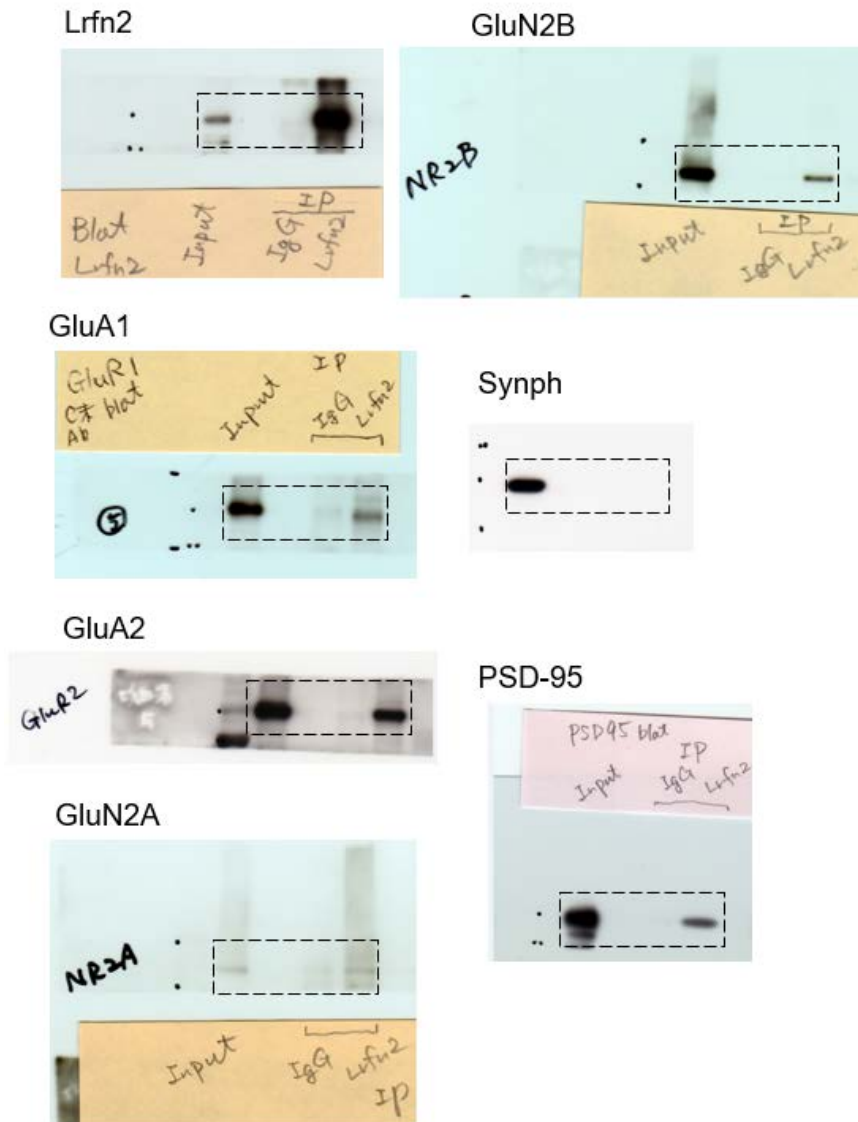

Full blots for Supplementary Figure 2d

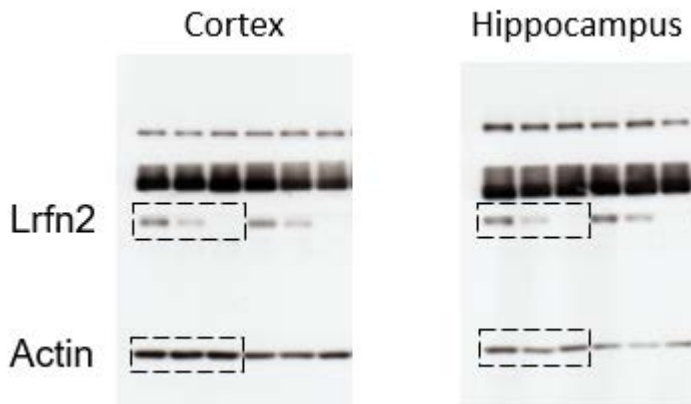

## Supplementary Figure 9. Full blot pictures.

Untrimmed immunoblot pictures for Figures 1a-c, 7, 8a, and 9d, and Supplementary Figure 1a, 1b, 1d, and 2d.

Supplementary Table 1. Expression levels of synaptic proteins in Triton-X100 insoluble fraction from adult hippocampus

| Synaptic proteins        | Protein levels in Triton X-100 insoluble fraction<br>(% ± SEM) |              |          |  | P-value |
|--------------------------|----------------------------------------------------------------|--------------|----------|--|---------|
|                          | WT (n=8)                                                       |              | KO (n=9) |  |         |
| GluA1                    | 100.0 ± 9.3                                                    | 68.5 ± 8.2 * | 0.016    |  |         |
| GluA2                    | 100.0 ± 12.4                                                   | 85.2 ± 10.7  | 0.348    |  |         |
| GluN1                    | 100.0 ± 8.7                                                    | 102.1 ± 13.4 | 0.891    |  |         |
| GluN2A                   | 100.0 ± 13.6                                                   | 111.6 ± 22.5 | 0.658    |  |         |
| GluN2B                   | 100.0 ± 18.0                                                   | 90.1 ± 18.3  | 0.688    |  |         |
| GABAR <sup>1)</sup>      | 100.0 ± 14.0                                                   | 118.5 ± 24.4 | 0.443    |  |         |
| Synapsin I <sup>1)</sup> | 100.0 ± 7.4                                                    | 107.8 ± 12.3 | 0.562    |  |         |

1) WT, n=5; KO, n=5

\* p<0.05

Supplementary Table 2. Linkage analysis of tag SNPs in LRFN2 regions with Asian schizophrenia and autism patients

| SNP ID     | Position <sup>a</sup> | Alleles | NIMH Chinese pedigrees |           |                  |             |               |            |                     |                     | Japanese cases and controls |           |                  |                         |                            |            |         |                     |
|------------|-----------------------|---------|------------------------|-----------|------------------|-------------|---------------|------------|---------------------|---------------------|-----------------------------|-----------|------------------|-------------------------|----------------------------|------------|---------|---------------------|
|            |                       |         | Minor allele           | Frequency | Over-transmitted | Transmitted | Untransmitted | Chi square | P value             | HWpval <sup>b</sup> | Minor allele                | Frequency | Over-represented | case ratio <sup>c</sup> | control ratio <sup>c</sup> | Chi square | P value | HWpval <sup>b</sup> |
| rs1433723  | 40,458,377            | AG      | G                      | 0.155     | G                | 150         | 128           | 1.741      | 0.187               | 0.2266              | G                           | 0.169     | A                | 939:187                 | 943:197                    | 0.182      | 0.6693  | 0.8158              |
| rs16863    | 40,458,913            | GA      | G                      | 0.399     | G                | 249         | 239           | 0.205      | 0.6508              | 0.0612              | A                           | 0.394     | A                | 448:674                 | 443:695                    | 0.237      | 0.6264  | 0.3842              |
| rs2916256  | 40,459,030            | AG      | G                      | 0.297     | A                | 229         | 206           | 1.216      | 0.2701              | 0.072               | G                           | 0.22      | A                | 892:236                 | 873:263                    | 1.637      | 0.2007  | 0.2547              |
| rs6458154  | 40,461,984            | CT      | T                      | 0.458     | T                | 269         | 267           | 0.007      | 0.9312              | 0.3237              | T                           | 0.391     | C                | 698:424                 | 676:458                    | 1.599      | 0.206   | 0.1271              |
| rs6903068  | 40,462,294            | CA      | A                      | 0.307     | -                | 238         | 238           | 0          | 1                   | 0.8082              | A                           | 0.176     | A                | 215:911                 | 182:952                    | 3.617      | 0.0572  | 0.8003              |
| rs1433721  | 40,462,772            | CG      | C                      | 0.321     | C                | 228         | 225           | 0.02       | 0.8879              | 0.0474              | G                           | 0.484     | C                | 574:524                 | 579:557                    | 0.383      | 0.5361  | 0.7269              |
| rs2436728  | 40,473,579            | TC      | C                      | 0.497     | C                | 280         | 246           | 2.198      | 0.1382              | 0.1891              | C                           | 0.412     | C                | 475:649                 | 456:680                    | 1.047      | 0.3062  | 1                   |
| rs17681686 | 40,475,116            | CG      | G                      | 0.179     | C                | 175         | 156           | 1.091      | 0.2963              | 0.9492              | G                           | 0.363     | G                | 410:718                 | 410:724                    | 0.009      | 0.9242  | 0.3041              |
| rs934465   | 40,478,477            | TC      | C                      | 0.492     | T                | 264         | 233           | 1.934      | 0.1644              | 0.008               | C                           | 0.371     | C                | 419:709                 | 422:716                    | 0.001      | 0.9753  | 0.0848              |
| rs13207019 | 40,483,083            | GA      | A                      | 0.319     | A                | 242         | 235           | 0.103      | 0.7486              | 0.5565              | A                           | 0.464     | G                | 611:515                 | 599:531                    | 0.357      | 0.5504  | 0.33                |
| rs752556   | 40,485,971            | TA      | A                      | 0.299     | A                | 255         | 205           | 5.435      | 0.0197 <sup>d</sup> | 0.7769              | A                           | 0.273     | T                | 819:305                 | 823:313                    | 0.05       | 0.8238  | 0.0979              |
| rs2033528  | 40,487,877            | CT      | T                      | 0.321     | T                | 257         | 208           | 5.163      | 0.0231 <sup>d</sup> | 0.2204              | T                           | 0.323     | T                | 366:762                 | 364:770                    | 0.031      | 0.8595  | 0.1823              |
| rs13205455 | 40,494,953            | CT      | T                      | 0.32      | T                | 240         | 226           | 0.421      | 0.5166              | 0.4455              | T                           | 0.431     | C                | 649:477                 | 638:498                    | 0.502      | 0.4786  | 0.5044              |
| rs9394689  | 40,496,545            | TC      | C                      | 0.182     | C                | 177         | 154           | 1.598      | 0.2062              | 1                   | C                           | 0.15      | C                | 180:948                 | 160:976                    | 1.556      | 0.2123  | 0.3457              |
| rs13196792 | 40,500,347            | GA      | A                      | 0.292     | G                | 226         | 221           | 0.056      | 0.8131              | 0.4349              | A                           | 0.478     | G                | 597:529                 | 581:551                    | 0.65       | 0.4203  | 0.3017              |
| rs6931355  | 40,502,453            | TG      | G                      | 0.312     | G                | 246         | 207           | 3.358      | 0.0669              | 0.1373              | G                           | 0.26      | G                | 301:825                 | 284:836                    | 0.551      | 0.458   | 0.4007              |
| rs4714347  | 40,514,901            | TC      | C                      | 0.203     | C                | 189         | 160           | 2.41       | 0.1206              | 0.325               | C                           | 0.227     | T                | 871:255                 | 868:256                    | 0.005      | 0.9417  | 0.9472              |
| rs6910503  | 40,515,958            | GA      | A                      | 0.15      | A                | 160         | 125           | 4.298      | 0.0382 <sup>d</sup> | 0.8367              | A                           | 0.158     | A                | 179:947                 | 179:955                    | 0.005      | 0.9418  | 1                   |
| rs919875   | 40,519,678            | TC      | C                      | 0.144     | C                | 137         | 134           | 0.033      | 0.8554              | 1                   | C                           | 0.069     | C                | 78:1048                 | 78:1060                    | 0.005      | 0.9453  | 0.314               |
| rs4236068  | 40,521,011            | AG      | G                      | 0.083     | A                | 91          | 78            | 1          | 0.3173              | 1                   | G                           | 0.086     | A                | 1031:91                 | 1029:103                   | 0.7        | 0.4028  | 1                   |
| rs10947890 | 40,523,715            | GC      | C                      | 0.294     | C                | 235         | 215           | 0.889      | 0.3458              | 1                   | C                           | 0.238     | G                | 866:260                 | 856:278                    | 0.632      | 0.4266  | 0.2202              |
| rs12198137 | 40,523,897            | GT      | T                      | 0.347     | G                | 261         | 249           | 0.282      | 0.5952              | 1                   | T                           | 0.333     | G                | 752:370                 | 751:379                    | 0.08       | 0.7768  | 0.5849              |
| rs1433734  | 40,524,778            | GT      | T                      | 0.123     | T                | 125         | 115           | 0.417      | 0.5186              | 0.988               | T                           | 0.158     | G                | 959:167                 | 943:189                    | 1.478      | 0.2241  | 0.8965              |
| rs1465718  | 40,528,938            | CG      | G                      | 0.181     | G                | 177         | 146           | 2.975      | 0.0845              | 0.6091              | G                           | 0.18      | C                | 936:186                 | 916:220                    | 2.977      | 0.0845  | 0.3197              |
| rs9394697  | 40,529,146            | GA      | A                      | 0.456     | G                | 281         | 260           | 0.815      | 0.3666              | 0.8291              | A                           | 0.479     | A                | 556:566                 | 524:608                    | 2.406      | 0.1208  | 0.4111              |
| rs11962841 | 40,543,639            | AG      | G                      | 0.166     | A                | 166         | 140           | 2.209      | 0.1372              | 0.7817              | G                           | 0.135     | A                | 986:142                 | 974:164                    | 1.611      | 0.2043  | 0.031               |
| rs9296336  | 40,548,746            | AG      | G                      | 0.213     | A                | 195         | 169           | 1.857      | 0.173               | 0.5304              | G                           | 0.234     | A                | 874:254                 | 859:275                    | 0.948      | 0.3303  | 0.5323              |
| rs1433731  | 40,562,386            | AC      | C                      | 0.287     | A                | 241         | 220           | 0.957      | 0.328               | 0.8262              | C                           | 0.325     | A                | 779:347                 | 744:386                    | 2.872      | 0.0901  | 0.1962              |
| rs6925136  | 40,566,237            | CA      | A                      | 0.159     | C                | 160         | 133           | 2.488      | 0.1147              | 0.717               | A                           | 0.141     | C                | 975:149                 | 961:169                    | 1.343      | 0.2465  | 0.0821              |
| rs2077719  | 40,566,537            | AG      | G                      | 0.293     | A                | 238         | 232           | 0.077      | 0.782               | 1                   | G                           | 0.295     | A                | 811:317                 | 776:348                    | 2.21       | 0.1371  | 0.0955              |
| rs9357332  | 40,568,204            | TC      | C                      | 0.195     | T                | 185         | 163           | 1.391      | 0.2383              | 0.8346              | C                           | 0.17      | T                | 943:183                 | 937:201                    | 0.799      | 0.3713  | 0.2904              |
| rs9369207  | 40,569,897            | AG      | G                      | 0.158     | A                | 153         | 137           | 0.883      | 0.3474              | 1                   | G                           | 0.141     | A                | 977:149                 | 967:171                    | 1.5        | 0.2206  | 0.1299              |
| rs1114593  | 40,570,829            | CT      | T                      | 0.095     | T                | 105         | 91            | 1          | 0.3173              | 0.8465              | T                           | 0.078     | C                | 1044:82                 | 1039:95                    | 0.938      | 0.3327  | 1                   |
| rs2504832  | 40,576,968            | TA      | A                      | 0.431     | A                | 288         | 267           | 0.795      | 0.3727              | 0.8852              | A                           | 0.399     | T                | 683:445                 | 675:457                    | 0.2        | 0.655   | 0.2328              |
| rs1036287  | 40,583,786            | CT      | T                      | 0.4       | T                | 276         | 252           | 1.091      | 0.2963              | 0.5567              | T                           | 0.365     | C                | 719:407                 | 719:419                    | 0.111      | 0.7393  | 0.2518              |
| rs9394701  | 40,584,431            | CT      | T                      | 0.112     | T                | 120         | 100           | 1.818      | 0.1775              | 1                   | T                           | 0.077     | C                | 1052:76                 | 1035:99                    | 3.145      | 0.0761  | 0.9626              |
| rs12663856 | 40,585,226            | AT      | T                      | 0.093     | A                | 104         | 83            | 2.358      | 0.1246              | 0.7152              | T                           | 0.117     | A                | 995:131                 | 1000:134                   | 0.018      | 0.8928  | 0.5813              |
| rs2235705  | 40,594,137            | CT      | T                      | 0.365     | T                | 267         | 242           | 1.228      | 0.2678              | 0.5065              | T                           | 0.332     | T                | 376:748                 | 374:762                    | 0.071      | 0.7893  | 0.9127              |
| rs2281263  | 40,595,767            | GA      | A                      | 0.172     | A                | 175         | 157           | 0.976      | 0.3232              | 0.4748              | A                           | 0.106     | G                | 1008:116                | 1013:123                   | 0.154      | 0.695   | 0.7516              |
| rs909987   | 40,596,619            | CT      | T                      | 0.428     | T                | 273         | 267           | 0.067      | 0.7963              | 0.5646              | T                           | 0.411     | T                | 466:662                 | 467:673                    | 0.028      | 0.8666  | 0.517               |
| rs382023   | 40,599,218            | TC      | C                      | 0.462     | T                | 279         | 257           | 0.903      | 0.342               | 0.4462              | C                           | 0.47      | C                | 529:591                 | 526:598                    | 0.043      | 0.8365  | 0.753               |
| rs7356878  | 40,602,833            | AC      | C                      | 0.478     | C                | 299         | 275           | 1.003      | 0.3165              | 0.7512              | C                           | 0.493     | A                | 573:553                 | 573:563                    | 0.045      | 0.8313  | 0.8421              |
| rs9471364  | 40,602,943            | CG      | C                      | 0.488     | C                | 304         | 281           | 0.904      | 0.3416              | 0.3395              | G                           | 0.475     | G                | 539:587                 | 536:600                    | 0.107      | 0.7441  | 0.6489              |
| rs9471365  | 40,611,372            | AG      | G                      | 0.232     | G                | 208         | 208           | 0.038      | 0.8453              | 0.4275              | G                           | 0.32      | G                | 366:762                 | 360:780                    | 0.196      | 0.6578  | 0.3687              |
| rs2196100  | 40,618,633            | TC      | C                      | 0.163     | T                | 166         | 153           | 0.53       | 0.4667              | 0.831               | C                           | 0.246     | C                | 288:840                 | 269:869                    | 1.096      | 0.2951  | 0.8503              |
| rs2395749  | 40,631,842            | CT      | T                      | 0.235     | T                | 213         | 208           | 0.059      | 0.8075              | 0.6018              | T                           | 0.353     | T                | 408:718                 | 391:747                    | 0.872      | 0.3504  | 0.4635              |
| rs10947897 | 40,638,778            | TG      | G                      | 0.244     | T                | 217         | 210           | 0.115      | 0.7348              | 0.7107              | G                           | 0.343     | G                | 389:737                 | 388:750                    | 0.051      | 0.8208  | 0.0805              |
| rs846520   | 40,672,703            | GC      | C                      | 0.274     | G                | 254         | 238           | 0.52       | 0.4707              | 0.0425              | C                           | 0.399     | C                | 457:669                 | 448:692                    | 0.392      | 0.5314  | 0.6286              |

<sup>a</sup>The physical position (base) on chromosome 6 by the NCBI Build 35 map.

<sup>b</sup>P values for deviation from Hardy-Weinberg equilibrium.

<sup>c</sup>The allele count ratio (the over-represented allele : the under-represented allele)

<sup>d</sup>These markers were nominally significant by single-marker test. After correction for multiple-testing by 10,000 permutations, P values for rs752556, rs2033528, and rs6910503 were 0.4438, 0.4946, and 0.6658, respectively.
